# Supplementary material for: Performance of a deep learning system for automatic diagnosis of protruding lesions in colon capsule endoscopy: a multicentric study
Source: Research Square preprint supplement (doi:10.21203/rs.3.rs-284396/v1), 2021-03-04
Supplement: Supplementary file 1 [file c1c094336aef4d46a9c04b34.docx]

**Table 1** - Confusion matrix and performance marks

|  |  | Expert classification | |
| --- | --- | --- | --- |
|  |  | Protruding lesion | Normal mucosa |
| CNN classification | Protruding lesion | 434 | 6 |
| Normal mucosa | 48 | 655 |
|  | Sensitivity | 90.0% | |
|  | Specificity | 99.1% | |
|  | PPV | 98.6% | |
|  | NPV | 93.2% | |
|  | Accuracy | 95.3% | |

Abbreviations: CNN – convolutional neural network; PPV – positive predictive value; NPV – negative predictive value
